# Supplementary material for: The Doppler Perfusion Index of the Liver and the Underlying Duplex Sonography of Visceral Vessels—A Systematic and Comprehensive Evaluation of Reproducibility
Source: MDPI journal article supplement (doi:10.3390/diagnostics14070778), 2024-04-08

**Figure S1**

*PV Bland-Altman plot for diameter*

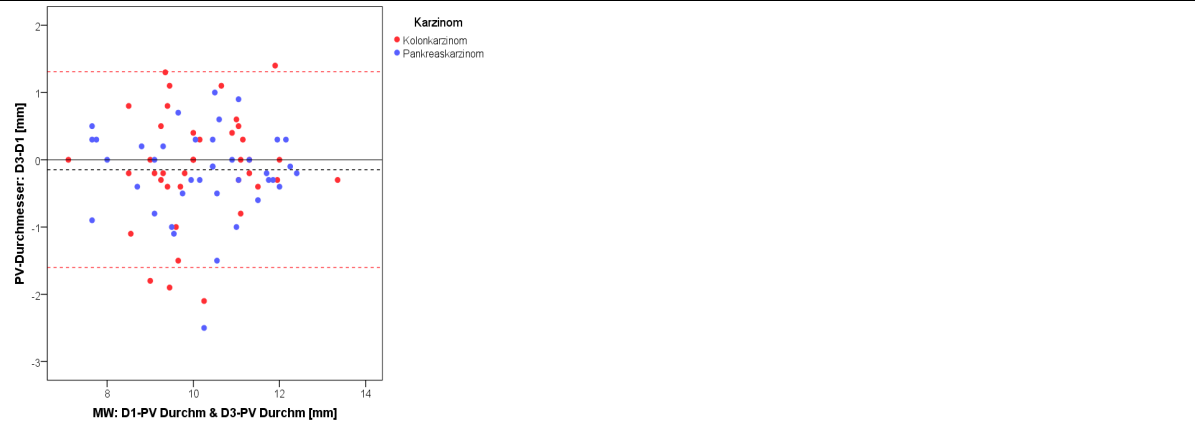

Note. Labeling in German: Kolonkarzinom=CRC, Pankreaskarzinom=PDAC, Durchmesser=diameter

**Figure S2**

*PV Bland-Altman plot for insonation angle*

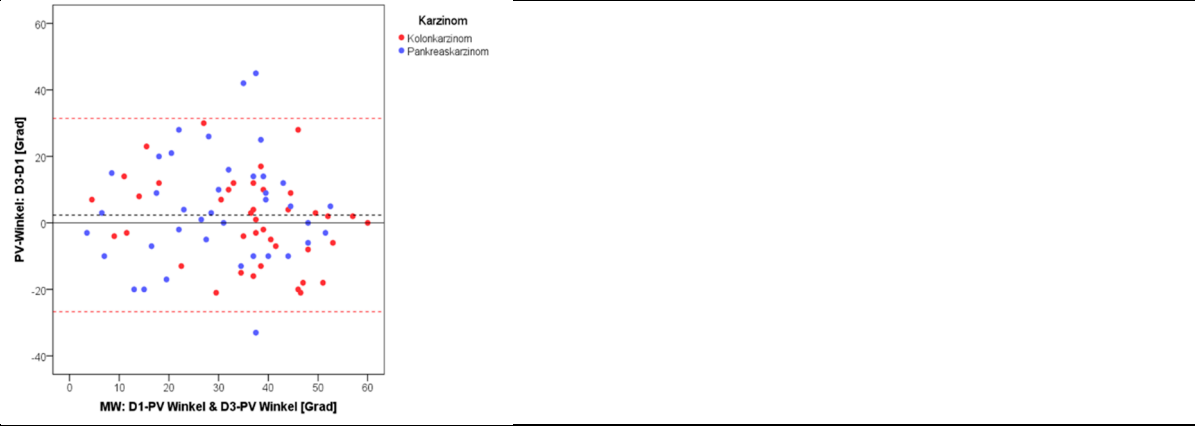

Note. Labeling in German: Kolonkarzinom=CRC, Pankreaskarzinom=PDAC, Winkel=insonation angle

**Figure S3**

*PV Bland-Altman plot for Doppler shift*

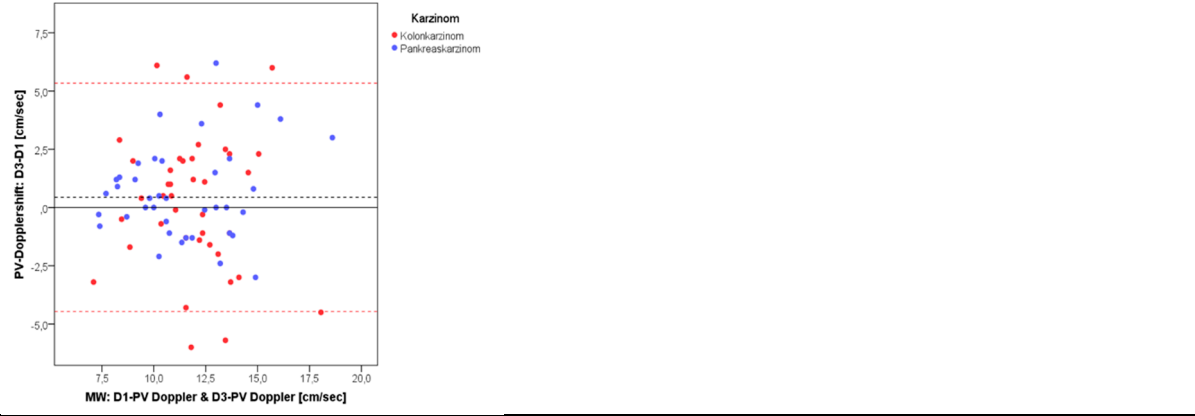

Note. Labeling in German: Kolonkarzinom=CRC, Pankreaskarzinom=PDAC, Dopplershift=Doppler shift

**Figure S4**

*PV Bland-Altman plot for blood flow*

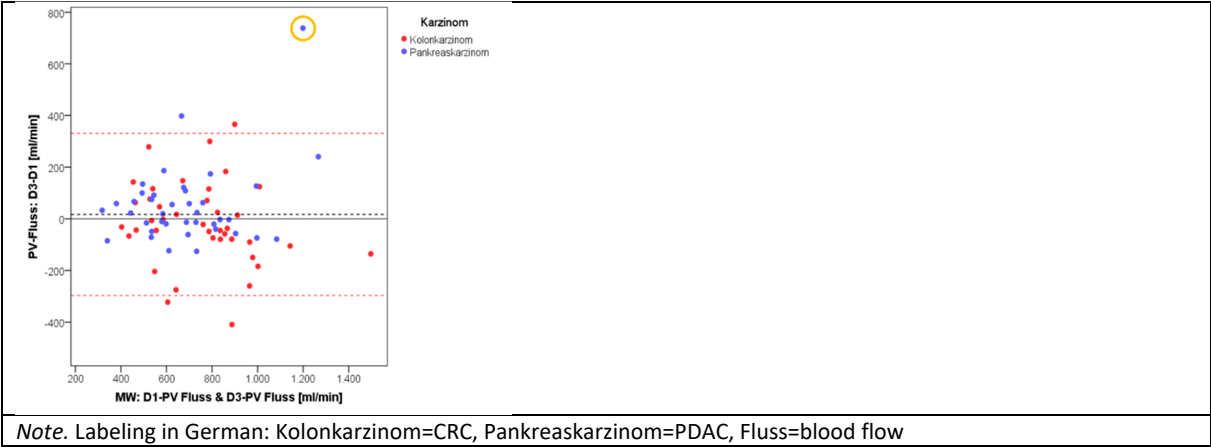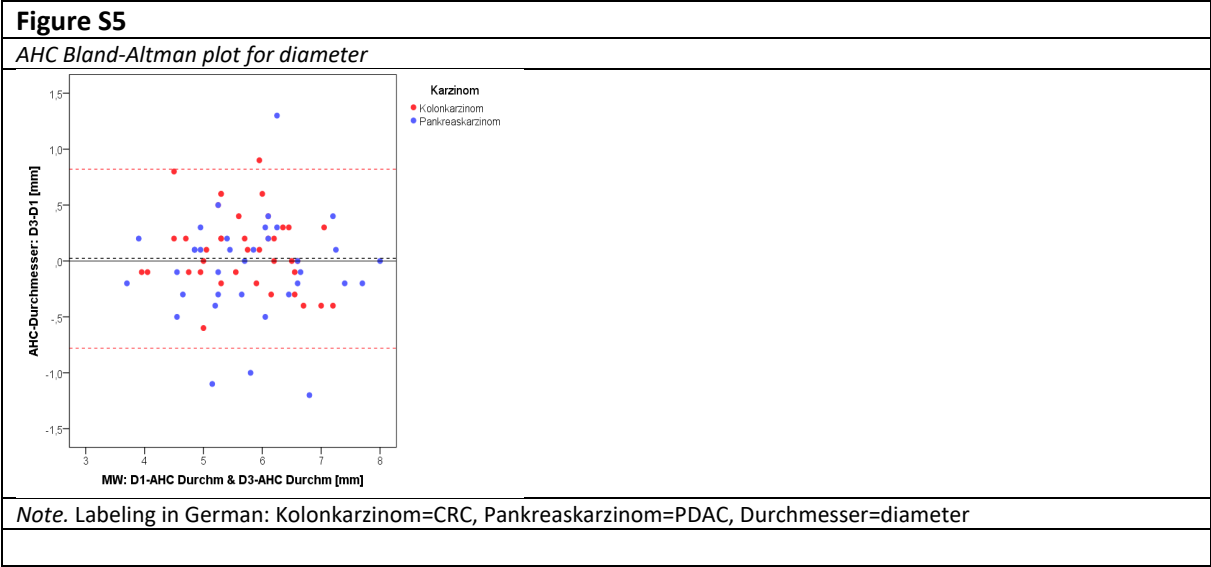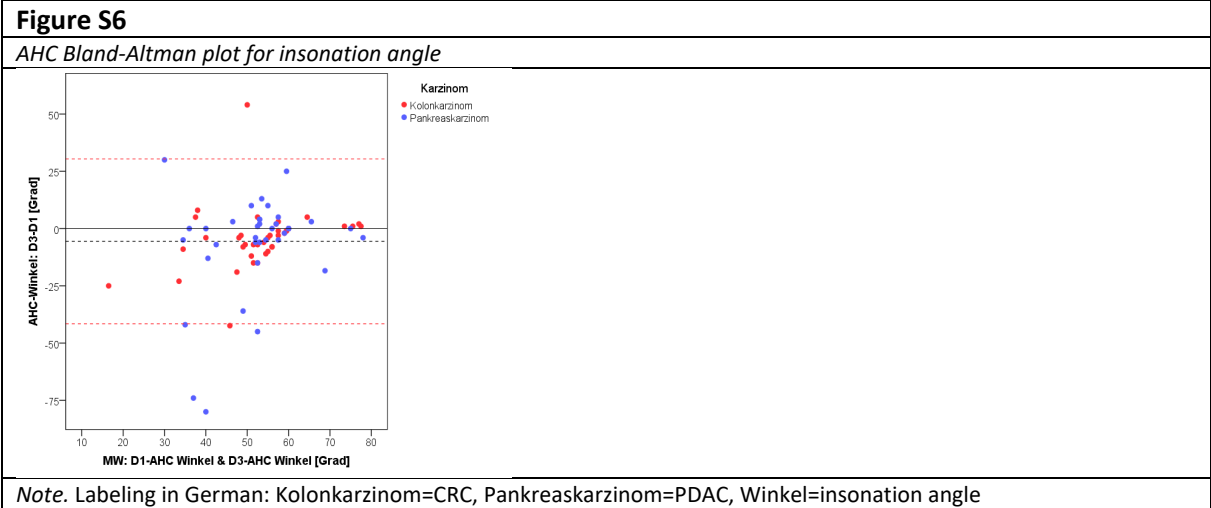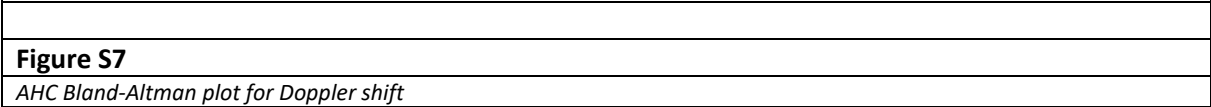

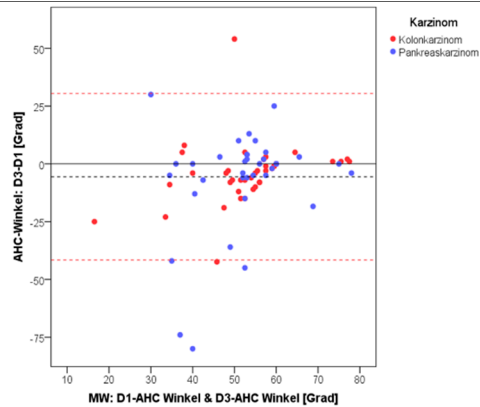

Note. Labeling in German: Kolonkarzinom=CRC, Pankreaskarzinom=PDAC, Dopplershift=Doppler shift

Figure S8

AHC Bland-Altman plot for blood flow

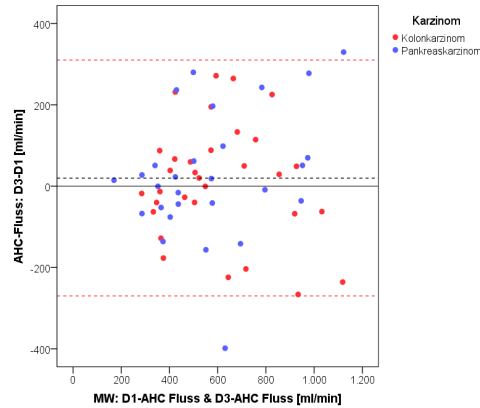

Note. Labeling in German: Kolonkarzinom=CRC, Pankreaskarzinom=PDAC, Fluss=blood flow

Figure S9

AHC Bland-Altman plot for Resistive Index

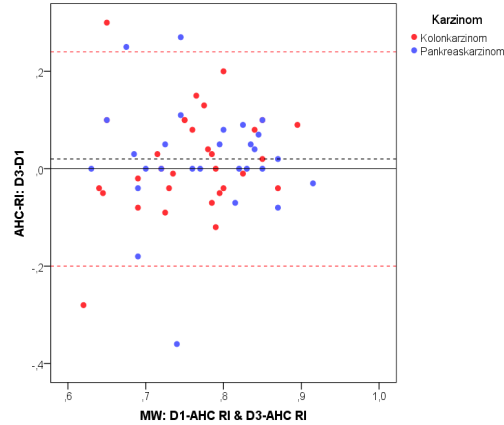

Note. Labeling in German: Kolonkarzinom=CRC, Pankreaskarzinom=PDAC

Figure S10

AHC Bland-Altman plot for DPI

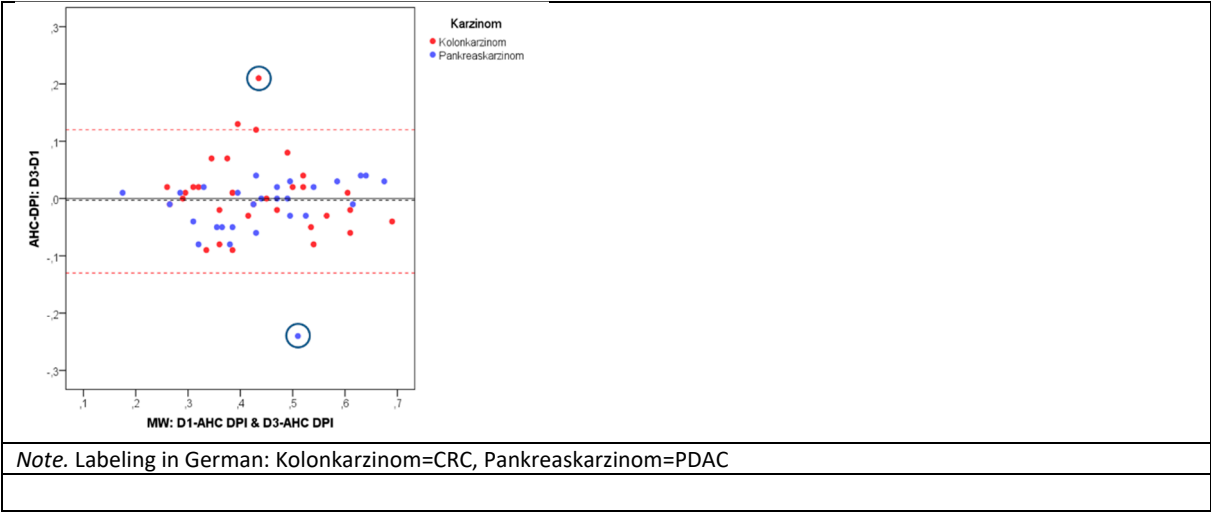

**Figure S11**

*AHP Bland-Altman plot for diameter*

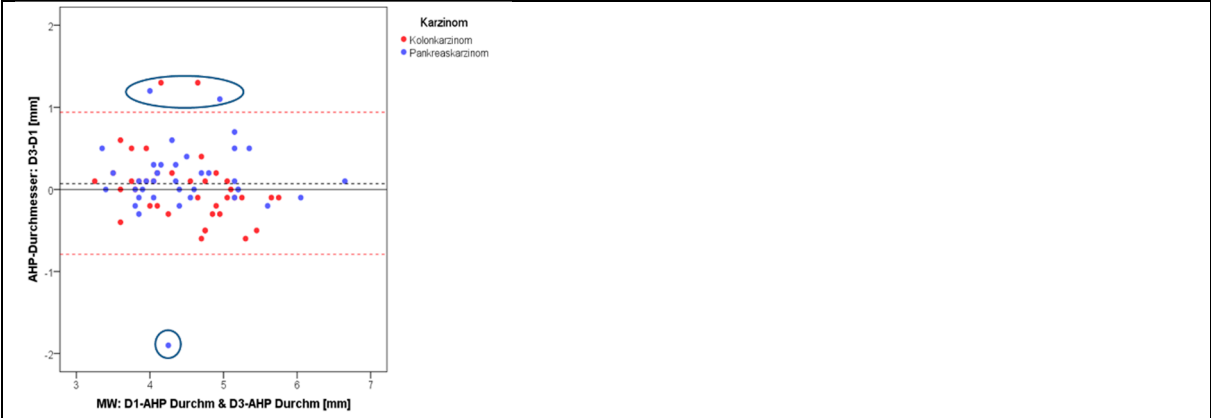

Note. Labeling in German: Kolonkarzinom=CRC, Pankreaskarzinom=PDAC, diamteer=Durchmesser

**Figure S12**

*AHP Bland-Altman plot for insonation angle*

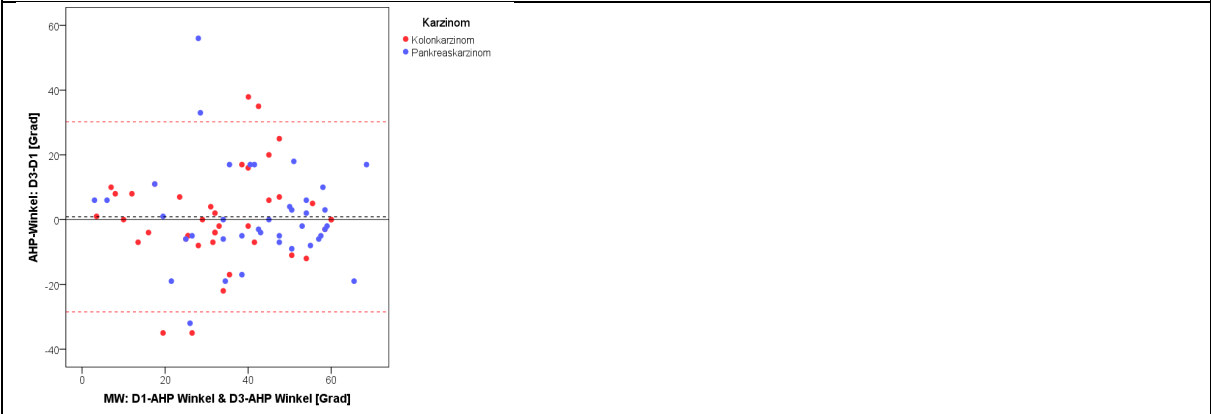

**Figure S13**

*AHP Bland-Altman plot for Doppler shift*

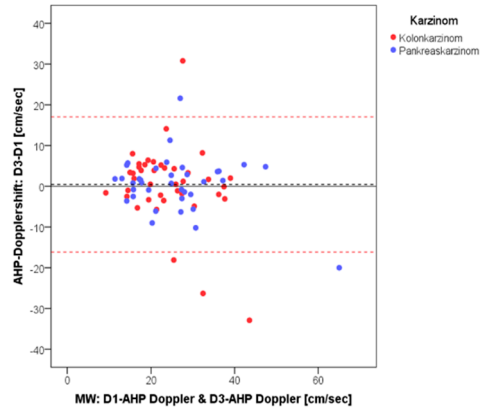

Note. Labeling in German: Kolonkarzinom=CRC, Pankreaskarzinom=PDAC, Dopplershift= Doppler shift

Figure S14

AHP Bland-Altman plot for blood flow

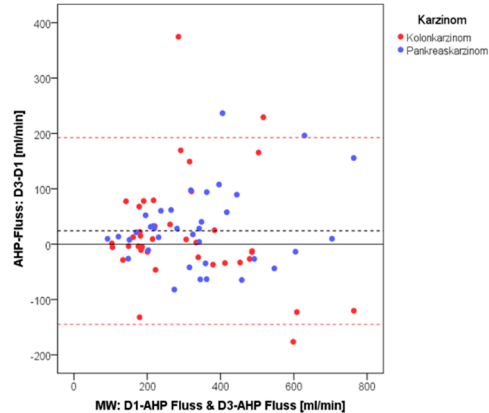

Note. Labeling in German: Kolonkarzinom=CRC, Pankreaskarzinom=PDAC, Fluss= blood flow

Figure S15

AHP Bland-Altman plot for Resistive Index

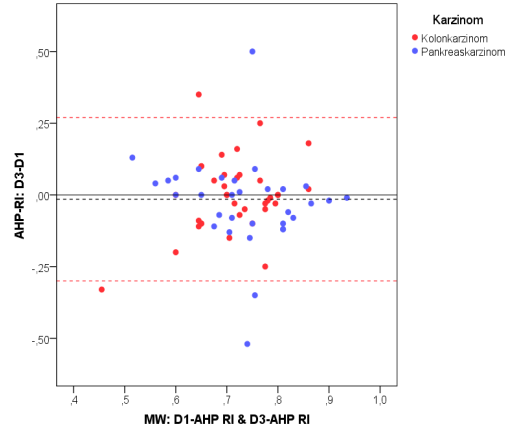

Note. Labeling in German: Kolonkarzinom=CRC, Pankreaskarzinom=PDAC

Figure S16

AHP Bland-Altman plot for DPI

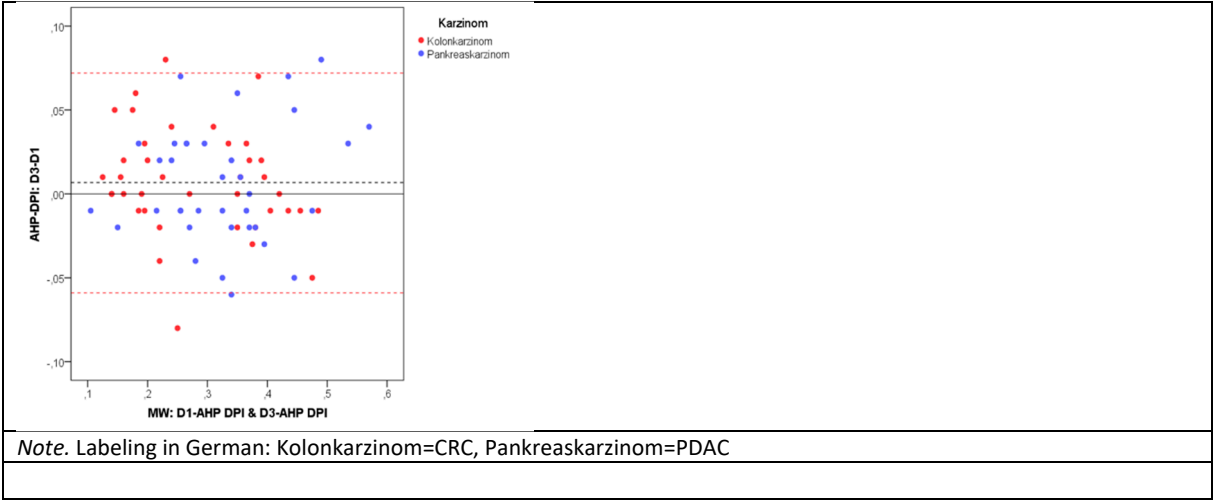

Supplement: s1 [file s1]
